# Supplementary material for: Developing a nomogram for preoperative prediction of cervical cancer lymph node metastasis by multiplex immunofluorescence
Source: BMC Cancer. 2023 May 30;23:485. doi: 10.1186/s12885-023-10932-0 (PMC10228122; doi:10.1186/s12885-023-10932-0)
Supplement: Supplementary file 2 — Supplementary Material 2 [file 12885_2023_10932_MOESM2_ESM.docx]

**Supplementary Table S1. The differential immune cells of cervical cancer (CC) with positive lymph node (LN) and CC with negative LN were analyzed by TCGA database.**

| Immune Cells   | NK Cells Resting |  | | --- | --- | | Macrophages M2 |  | | T Cells Follicular Helper |  | | T Cells CD4 Memory Resting |  | | Macrophages |  | | Dendritic Cells Resting |  | | Lymphocytes |  | | Mast Cells Resting |  | | T Cells CD4 Naive |  | | T Cells CD4 Memory Activated |  | | T Cells CD8 |  | | Mast Cells Activated |  | | Dendritic Cells Activated |  | | Macrophages M0 |  | | T Cells Regulatory Tregs |  | | Plasma Cells |  | | Monocytes |  | | Neutrophils |  | | Eosinophils |  | | B Cells Naive |  | | Dendritic Cells |  | | B Cells Memory |  | | T Cells gamma delta |  | | Mast Cells |  | | NK Cells Activated |  | | Macrophages M1 |  | | *p*   | 0.018541905 | | --- | | 0.047824583 | | 0.068322478 | | 0.080677069 | | 0.090194369 | | 0.09994947 | | 0.128978153 | | 0.143653743 | | 0.161284212 | | 0.177972695 | |  | | 0.186258009 | | 0.189166657 | | 0.190740752 | | 0.209207292 | | 0.263179585 | | 0.308225953 | | 0.459766988 | | 0.545253788 | | 0.545491581 | | 0.610608146 | | 0.682244064 | | 0.749376379 | | 0.784304749 | | 0.787269281 | | 0.849883239 | | 0.861498785 | | FC   | 2.192855302 | | --- | | 0.842309742 | | 1.162871985 | | 0.757890993 | | 0.864395489 | | 0.685821565 | | 1.057408527 | | 0.754401153 | | inf | | 2.335029839 | | 1.10527558 | | 1.773782423 | | 1.277881961 | | 0.744863256 | | 0.840718369 | | 0.937842547 | | 1.034213574 | | 0.687859301 | | 0.945682743 | | 1.027946402 | | 0.957811741 | | 1.041088781 | | 7.27846557 | | 1.041220345 | | 1.05215515 | | 0.991220603 | |
| --- | --- | --- | --- | --- | --- | --- | --- | --- | --- | --- | --- | --- | --- | --- | --- | --- | --- | --- | --- | --- | --- | --- | --- | --- | --- | --- | --- | --- | --- | --- | --- | --- | --- | --- | --- | --- | --- | --- | --- | --- | --- | --- | --- | --- | --- | --- | --- | --- | --- | --- | --- | --- | --- | --- | --- | --- | --- | --- | --- | --- | --- | --- | --- | --- | --- | --- | --- | --- | --- | --- | --- | --- | --- | --- | --- | --- | --- | --- | --- | --- | --- | --- | --- | --- | --- | --- | --- | --- | --- | --- | --- | --- | --- | --- | --- | --- | --- | --- | --- | --- | --- | --- | --- | --- | --- | --- | --- |
